# Supplementary material for: Chromosome-level genome assembly of hadal snailfish reveals mechanisms of deep-sea adaptation in vertebrates
Source: eLife. 2023 Dec 22;12:RP87198. doi: 10.7554/eLife.87198 (PMC10746142; doi:10.7554/eLife.87198)
Supplement: Supplementary file 2. [file elife-87198-supp2.xlsx]

## Sheet: Sheet1
Species	Sequencing technology	Sample	ID of library	Number of reads	Number of sequenced bases	Mean length of reads
Hadal snailfish	Nanopore	MHS04	1-E9-H9	898765	23358551553	25989.6
			2-E7-H7	851220	24489049393	28769.3
	Hi-C	MHS04	CL100089582_L01	1232922648	123292264800	100
	Illumina	MHS04	ANIcrcRAAAA-525	104495604	10449560400	100
			ANIcrcRAAAA-526	96679592	9667959200	100
			ANIcrcRAAAA-527	108361184	10836118400	100
			ANIcrcRAAAA-528	78114798	7811479800	100
			ANIcrcRAAAA-529	128287360	12828736000	100
			ANIcrcRAAAA-530	112533976	11253397600	100
			ANIcrcRAAAA-531	119688402	11968840200	100
			ANIcrcRAAAA-532	120058720	12005872000	100
		MHS05	FIStkwRAAAA-513	59854372	5985437200	100
			FIStkwRAAAA-514	38293100	3829310000	100
			FIStkwRAAAA-515	45536016	4553601600	100
			FIStkwRAAAA-516	59909422	5990942200	100
		MHS06	FIStkwRAAAB-529	57997078	5799707800	100
			FIStkwRAAAB-530	33763998	3376399800	100
			FIStkwRAAAB-531	55446658	5544665800	100
			FIStkwRAAAB-532	60286004	6028600400	100
		MHS07	FIStkwRAAAC-544	62328744	6232874400	100
			FIStkwRAAAC-545	40695892	4069589200	100
			FIStkwRAAAC-546	60126202	6012620200	100
			FIStkwRAAAC-547	43180218	4318021800	100
Tanaka's snailfish	Nanopore	TS2	NPL1013-P1	1659010	39023659346	23522.3
	Hi-C	TS02	G05	663068716	99460307400	150
	Illumina	TS02	jirou_C	342123824	51318573600	150
		TS03	L1_FISvdyRAAAH-525	28362384	4254357600	150
			L1_FISvdyRAAAH-532	33617380	5042607000	150
			L2_FISvdyRAAAH-525	28375328	4256299200	150
			L2_FISvdyRAAAH-532	33597258	5039588700	150
		TS04	L3_FISvdyRAAAI-502	31964998	4794749700	150
			L3_FISvdyRAAAI-508	33161096	4974164400	150
			L4_FISvdyRAAAI-502	30606316	4590947400	150
			L4_FISvdyRAAAI-508	32079400	4811910000	150
		TS05	L1_FISvdyRAAAJ-509	29898940	4484841000	150
			L1_FISvdyRAAAJ-510	28662948	4299442200	150
			L2_FISvdyRAAAJ-509	29999222	4499883300	150
			L2_FISvdyRAAAJ-510	28830044	4324506600	150
