# Supplementary material for: Chromosome-level genome assembly of hadal snailfish reveals mechanisms of deep-sea adaptation in vertebrates
Source: eLife. 2023 Dec 22;12:RP87198. doi: 10.7554/eLife.87198 (PMC10746142; doi:10.7554/eLife.87198)
Supplement: Supplementary file 3. [file elife-87198-supp3.xlsx]

## Sheet: Sheet1
	hadal snailfish				Tanaka's snailfish
	Contig Size (bp)	Number	Scaffold Size (bp)	Number	Contig Size (bp)	Number	Scaffold Size (bp)	Number
N90	391659	216	22226877	21	488038	225	15372104	22
N80	1199949	127	23411436	19	961961	145	19898281	19
N70	2172367	87	24184323	16	1568523	102	20999279	16
N60	2767116	62	24710793	14	2292284	73	22413529	14
N50	4219354	44	25738204	11	3015465	51	23043945	11
Longest (bp)	17068874		35158290		14501553		29428813
Total Number	1173		199		1666		926
Total Size (bp)	625564155		626439101		554057755		554262586
