# Supplementary material for: Chromosome-level genome assembly of hadal snailfish reveals mechanisms of deep-sea adaptation in vertebrates
Source: eLife. 2023 Dec 22;12:RP87198. doi: 10.7554/eLife.87198 (PMC10746142; doi:10.7554/eLife.87198)
Supplement: Supplementary file 5. [file elife-87198-supp5.xlsx]

## Sheet: Sheet1
	Species	Sample	Tissue	Library	Reads number	Length (bp)	Average length (bp)	Sources
	hadal snailfish	MHS02	brain	——	55983014	7949451628	146	SRR8644925
			cholecyst	——	70854482	10215072096	147	SRR7206521
			heart	——	81635428	11781699954	147	SRR8644927
			muscle	——	32621398	4502009266	145	SRR8644931
			spinal cord	——	87997406	12622925938	145	SRR8644926
		MHS03	bone	——	21437614	2948326629	146	SRR7206534
			brain	——	30027220	4068119725	143	SRR7206525
			cholecyst	——	31917678	4453667619	145	SRR8644921
			heart	——	33016094	4542218836	144	SRR7206527
			muscle	——	26463980	3655545031	145	SRR7206531
			spinal cord	——	24359600	3296245506	144	SRR7206526
		MHS05	eye	eye-1-MHS	104749042	10474904200	100	this work
			heart	heart-3-MHS	104868424	10486842400	100
			liver	liver-1-MHS	105393874	10539387400	100
			skin	skin-1-MHS	104398744	10439874400	100
		MHS06	eye	eye-2-MHS	103556858	10355685800	100
			liver	liver-2-MHS	107973836	10797383600	100
			muscle	muscle-3-MHS	109898270	10989827000	100
			skin	skin-2-MHS	106838466	10683846600	100
			stomach	wei-1-MHS	105142662	10514266200	100
		MHS07	liver	liver-3-MHS	107390544	10739054400	100
			stomach	wei-2-MHS	102957526	10295752600	100
	Tanaka's snialfish	TS03	brian	brian-1-tanaka	107844086	10784408600	100	this work
			eye	eye-1-tanaka	104603232	10460323200	100
			heart	heart-1-tanaka	104151722	10415172200	100
			liver	liver-1-tanaka	106872978	10687297800	100
			muscle	muscle-1-tanaka	105427590	10542759000	100
			skin	skin-1-tanaka	102214270	10221427000	100
			stomach	wei-1-tanaka	104705962	10470596200	100
		TS04	bone	bone-2-tanaka	104963922	10496392200	100
			brian	brian-2-tanaka	104351950	10435195000	100
			cholecyst	dan-2-tanaka	103815146	10381514600	100
			eye	eye-2-tanaka	105165272	10516527200	100
			heart	heart-2-tanaka	105088896	10508889600	100
			liver	liver-2-tanaka	102805866	10280586600	100
			muscle	muscle-2-tanaka	101364312	10136431200	100
			spinal cord	spinal-2-tanaka	104325258	10432525800	100
			stomach	wei-2-tanaka	105435758	10543575800	100
		TS05	bone	bone-3-tanaka	109129182	10912918200	100
			brian	brian-3-tanaka	102411722	10241172200	100
			cholecyst	dan-3-tanaka	103891338	10389133800	100
			eye	eye-3-tanaka	105090818	10509081800	100
			heart	heart-3-tanaka	104855638	10485563800	100
			liver	liver-3-tanaka	104649678	10464967800	100
			muscle	muscle-3-tanaka	103108740	10310874000	100
			skin	skin-3-tanaka	104021022	10402102200	100
			spinal cord	spinal-3-tanaka	101745654	10174565400	100
			stomach	wei-3-tanaka	108681938	10868193800	100
	zebrafish	——	bone	——				SRR18056674, SRR18056676, SRR18056677, SRR18056679
		——	brian	——				PRJNA764015
		——	eye	——				SRR16647480-SRR16647483
		——	heart	——				SRR13374845-SRR13374847
		——	liver	——				PRJNA764015
		——	muscle	——				PRJNA764015
		——	skin	——				SRR10895887-SRR10895892
		——	spinal cord	——				SRR10895875-SRR10895878, SRR10895881
