# Supplementary material for: Chromosome-level genome assembly of hadal snailfish reveals mechanisms of deep-sea adaptation in vertebrates
Source: eLife. 2023 Dec 22;12:RP87198. doi: 10.7554/eLife.87198 (PMC10746142; doi:10.7554/eLife.87198)
Supplement: Supplementary file 6. [file elife-87198-supp6.xlsx]

## Sheet: Sheet1
Species	Genome assembly version	Scaffolds number	Total length (bp)	N50 of scaffolds (bp)
Hadal snailfish	this work	199	626439101	25738204
Tanaka's snailfish	this work	926	554262514	23043945
Stickleback	Ensembl (BROADS1)	1844	461533448	18115788
Pacific bluefin tuna	GCA_021601225.1	16801	740348846	136950
Medaka	Ensembl (GRCz11.98)	24	677633405	28873095
Platy fish	Ensembl (X maculatus-5.0)	20632	729664433	1303070
Atlantic cod	Ensembl (gadMor1)	398859	832114588	136353
Flatfish	GCF_001970005.1	9525	643911827	10546925
Zebrafish	Ensembl (GRCz11)	993	1373471384	54304671
Turbot	Ensembl (ASM318616v1)	22	524979463	24811384
Fugu	Ensembl (FUGU5)	6835	391484725	11516971
Spotted gar	Ensembl (LepOcu1)	1926	945878036	50348508
Coelacanth	Ensembl (LatCha1)	22819	2860591921	924513
Chicken	Ensembl (Gallus gallus-5.0)	23475	1230258557	82310166
Mouse	Ensembl (GRCm38)	66	2730871774	130694993
Human	Ensembl (GRCh38)	194	3099750718	145138636
Brownbanded bamboo shark	GCA_003427335.1	1145194	3851610035	69975007
Elephant shark	Ensembl (Callorhinchus milii-6.1.3)	21204	974498586	4521921
