# Supplementary material for: Chromosome-level genome assembly of hadal snailfish reveals mechanisms of deep-sea adaptation in vertebrates
Source: eLife. 2023 Dec 22;12:RP87198. doi: 10.7554/eLife.87198 (PMC10746142; doi:10.7554/eLife.87198)
Supplement: Supplementary file 7. [file elife-87198-supp7.xlsx]

## Sheet: Sheet1
		Repbase Tes		TE proteins		De novo		Combined Tes
Species	Type	Length (bp)	Percent in genome	Length (bp)	Percent in genome	Length (bp)	Percent in genome	Length (bp)	Percent in genome
hadal snailfish	DNA	49969082	0.0800094	522621	0.000836809	70989907	0.113667	86032513	0.137565
	LINE	25127686	0.0402339	33173787	0.0531171	48699962	0.0779773	52315769	0.0836524
	SINE	925347	0.00148164	0	0	2897295	0.00463908	3197636	0.00511299
	LTR	11641868	0.0186407	10534119	0.016867	13422771	0.0214922	20613824	0.0329613
	Other	12205833	0.0195437	0	0	34341239	0.0549864	117703622	0.188207
	Unknown	260761	0.000417525	0	0	34939592	0.0559445	33903882	0.054212
	Total	100130577	0.160327	44230527	0.0708209	205290766	0.328707	245481550	0.392522
Tanaka's snailfish	DNA	61762107	0.111431	153360	0.000276692	43627754	0.0787131	71225926	0.128506
	LINE	11062444	0.0199589	11118474	0.0200599	23017919	0.0415289	27900710	0.0503384
	SINE	559686	0.00100978	0	0	2726622	0.00491937	3147544	0.0056788
	LTR	9020250	0.0162743	3518637	0.00634832	4519388	0.00815388	12541024	0.0226265
	Other	13599599	0.0245364	0	0	50024511	0.0902542	127716575	0.230426
	Unknown	85598	0.000154436	0	0	29219311	0.0527175	28202254	0.0508825
	Total	96089684	0.173365	14790471	0.026685	153135505	0.276287	185707210	0.335053
