# Supplementary material for: Chromosome-level genome assembly of hadal snailfish reveals mechanisms of deep-sea adaptation in vertebrates
Source: eLife. 2023 Dec 22;12:RP87198. doi: 10.7554/eLife.87198 (PMC10746142; doi:10.7554/eLife.87198)
Supplement: Supplementary file 8. [file elife-87198-supp8.xlsx]

## Sheet: Sheet1
ENSEMBLE transcript ID of stickleback	ENSEMBLE Gene ID of stickleback	gene name
ENSGACT00000000971	ENSGACG00000000754	NA
ENSGACT00000001855	ENSGACG00000001398	NA
ENSGACT00000002930	ENSGACG00000002254	NA
ENSGACT00000003129	ENSGACG00000002392	hs3st3l
ENSGACT00000003758	ENSGACG00000002861	opn4b
ENSGACT00000004448	ENSGACG00000003391	grpr
ENSGACT00000005608	ENSGACG00000004253	opn5
ENSGACT00000006986	ENSGACG00000005259	bco2b
ENSGACT00000007131	ENSGACG00000005386	tmtopsb
ENSGACT00000007315	ENSGACG00000005515	zmat4b
ENSGACT00000007324	ENSGACG00000005522	si:ch211-286b5.5
ENSGACT00000007559	ENSGACG00000005716	NA
ENSGACT00000008934	ENSGACG00000006726	pde6c
ENSGACT00000009439	ENSGACG00000007113	NA
ENSGACT00000009503	ENSGACG00000007162	NA
ENSGACT00000009768	ENSGACG00000007357	NA
ENSGACT00000010676	ENSGACG00000008053	NA
ENSGACT00000012030	ENSGACG00000009099	NA
ENSGACT00000012501	ENSGACG00000009458	soul3
ENSGACT00000012676	ENSGACG00000009594	ppm1na
ENSGACT00000013214	ENSGACG00000009990	opn8c
ENSGACT00000013478	ENSGACG00000010188	si:ch211-203k16.3
ENSGACT00000013860	ENSGACG00000010460	cry3
ENSGACT00000015270	ENSGACG00000011528	opn4a
ENSGACT00000015693	ENSGACG00000011844	tmem263
ENSGACT00000015908	ENSGACG00000012003	thrsp
ENSGACT00000017865	ENSGACG00000013485	per2a
ENSGACT00000018006	ENSGACG00000013598	NA
ENSGACT00000018041	ENSGACG00000013624	tmem251
ENSGACT00000018614	ENSGACG00000014070	cabp7
ENSGACT00000019007	ENSGACG00000014379	adamtsl3
ENSGACT00000020825	ENSGACG00000015748	grk7a
ENSGACT00000020994	ENSGACG00000015877	NA
ENSGACT00000021089	ENSGACG00000015952	mc1r
ENSGACT00000021418	ENSGACG00000016200	slc1a7a
ENSGACT00000021419	ENSGACG00000016205	NA
ENSGACT00000021493	ENSGACG00000016258	si:ch1073-82l19.1
ENSGACT00000021748	ENSGACG00000016441	cry5
ENSGACT00000022344	ENSGACG00000016885	opn4xa
ENSGACT00000023775	ENSGACG00000017965	NA
ENSGACT00000024159	ENSGACG00000018239	NA
ENSGACT00000024195	ENSGACG00000018266	ccni
ENSGACT00000024460	ENSGACG00000018464	NA
ENSGACT00000024664	ENSGACG00000018621	slc24a2
ENSGACT00000025027	ENSGACG00000018891	akr1b1.1
ENSGACT00000025567	ENSGACG00000019302	prl2
ENSGACT00000025968	ENSGACG00000019608	NA
ENSGACT00000026494	ENSGACG00000020014	sos1
ENSGACT00000026521	ENSGACG00000020037	cry1a
ENSGACT00000027539	ENSGACG00000020788	myo7ab
ENSGACT00000027683	ENSGACG00000020897	guca1d
