# Supplementary material for: Chromosome-level genome assembly of hadal snailfish reveals mechanisms of deep-sea adaptation in vertebrates
Source: eLife. 2023 Dec 22;12:RP87198. doi: 10.7554/eLife.87198 (PMC10746142; doi:10.7554/eLife.87198)
Supplement: Supplementary file 9. [file elife-87198-supp9.xlsx]

## Sheet: Sheet1
ENSEMBLE transcript ID of stickleback	ENSEMBLE Gene ID of stickleback	gene name
ENSGACT00000000480	ENSGACG00000000375	NA
ENSGACT00000000788	ENSGACG00000000611	gpr19
ENSGACT00000001752	ENSGACG00000001346	rdh20
ENSGACT00000006183	ENSGACG00000004668	NA
ENSGACT00000007461	ENSGACG00000005627	NA
ENSGACT00000008086	ENSGACG00000006099	NA
ENSGACT00000009252	ENSGACG00000006968	si:dkey-178k16.1
ENSGACT00000009487	ENSGACG00000007152	bglap
ENSGACT00000011918	ENSGACG00000008967	dnah5l
ENSGACT00000013609	ENSGACG00000010229	opn1sw2
ENSGACT00000014005	ENSGACG00000010575	gpr65
ENSGACT00000015577	ENSGACG00000011757	NA
ENSGACT00000015663	ENSGACG00000011823	gpr27
ENSGACT00000017747	ENSGACG00000013397	plppr3b
ENSGACT00000018536	ENSGACG00000014008	NA
ENSGACT00000020957	ENSGACG00000015845	PRTG
ENSGACT00000021892	ENSGACG00000016544	neil3
ENSGACT00000024186	ENSGACG00000018259	ccng2
ENSGACT00000025661	ENSGACG00000019379	NA
ENSGACT00000026992	ENSGACG00000020382	rrm1
