# Supplementary material for: Chromosome-level genome assembly of hadal snailfish reveals mechanisms of deep-sea adaptation in vertebrates
Source: eLife. 2023 Dec 22;12:RP87198. doi: 10.7554/eLife.87198 (PMC10746142; doi:10.7554/eLife.87198)
Supplement: Supplementary file 10. [file elife-87198-supp10.xlsx]

## Sheet: Sheet1
Gene name	Gene number
	hadal snailfish	Tanaka's snailfish
acaa1	5	1
asic1a	3	2
asrgl1	2	1
cldnj	3	1
cu638714.1	14	2
ENSGACT00000016830	4	1
erg28	2	1
fthl27	11	2
igf1	6	1
klhl10a	15	3
mxa	4	2
pebp1	2	1
ptgs1	5	2
si:ch211-193k19.2	23	2
si:ch211-57b15.2	21	7
si:ch211-57f7.7	7	2
stat1a	2	1
vbp1	2	1
zp3b	12	8
zp3f.1	11	7
zp3f.2	2	1
