# Supplementary material for: Chromosome-level genome assembly of hadal snailfish reveals mechanisms of deep-sea adaptation in vertebrates
Source: eLife. 2023 Dec 22;12:RP87198. doi: 10.7554/eLife.87198 (PMC10746142; doi:10.7554/eLife.87198)
Supplement: Supplementary file 11. [file elife-87198-supp11.xlsx]

## Sheet: Sheet1
Gene name	Type	AA sites	Transcripts of MHS
tmc1	loss	12	√
atxn2	loss	8	√
hace1	loss	7	√
bnip1a	loss	6	√
mtmr3	loss	6	√
mitfb	loss	5	√
zgc:172139	loss	5	√
pdik1l	loss	4	√
iqsec1	loss	4	√
tle1	loss	4	√
pou6f2	loss	4	√
nop56	loss	4	√
tnni1a	loss	3	√
ssbp2	loss	3	√
lef1	loss	3	√
mbnl2	gain	70	√
wdr37	gain	68	√
si:ch211-244b2.1	gain	51	√
phf6	gain	36	√
senp8	gain	35	√
atpsckmt	gain	24	√
grk4	gain	23	√
atad3A	gain	19	√
pbdc1	gain	19	√
si:ch73-116o1.2	gain	18	√
cdc7	gain	11	√
med24	gain	11	√
chtopa	gain	11	√
heatr5b	gain	9	√
znrd1	gain	8	√
cluha	gain	7	√
usp15	gain	5	√
tada2b	gain	4	√
