# Supplementary material for: Chromosome-level genome assembly of hadal snailfish reveals mechanisms of deep-sea adaptation in vertebrates
Source: eLife. 2023 Dec 22;12:RP87198. doi: 10.7554/eLife.87198 (PMC10746142; doi:10.7554/eLife.87198)
Supplement: Supplementary file 14. [file elife-87198-supp14.xlsx]

## Sheet: Sheet1
Funtion	Gene	hadal snailfish	Tanaka's snailfish	Type	log2FoldChange	p-value	Ajusted p_value
Stereocilia	mcoln3	36.32	0.18	up	7.33964	1.12e-11	1.61e-10
Stereocilia	tmc1	8.41	0.05	up	7.16709	8.23e-46	4.59e-43
otolith membrane	otog	61.31	0.91	up	5.73063	3.82e-07	2.42e-06
Stereocilia	tmc2b	305.28	7.97	up	4.91986	0.000469107	0.00151172
Supporting Cell	coch	182.86	4.8	up	4.91296	6.22e-05	0.000248818
Stereocilia	myo15aa	26.69	0.81	up	4.7108	1.3e-07	9.03e-07
Hair Cell	pou4f3	1.37	0.05	up	4.38618	0.00894111	0.0205925
Hair Cell	eya4	50.3	2.26	up	4.13492	0.00093295	0.00279589
Hair Cell	fgfr1a	156.14	7.37	up	4.06594	3.27e-09	3.05e-08
Stereocilia	myo7aa	7.34	0.35	up	4.11132	3.27e-11	4.31e-10
Hair Cell	eya1	84.77	4.48	up	3.91114	0.0126757	0.0279248
Stereocilia	myo3b	44.39	2.52	up	3.79461	1.56e-07	1.07e-06
Hair Cell	fgf20b	20.82	2.02	up	3.02872	0.0115318	0.0257181
Signal transduction	slc44a4	13.47	1.32	up	3.01776	2.09e-05	9.27e-05
Signal transduction	chrna9	7.88	0.81	up	2.97449	3.77e-06	1.96e-05
Hair Cell	six1b	112.4	12.02	up	2.9123	0.0239287	0.0484378
Stereocilia	triobpb	101.76	11.02	up	2.88912	4.13e-08	3.15e-07
Neurone	xpa	92.96	10.51	up	2.80291	3.56e-08	2.75e-07
Stereocilia	grxcr2	0.77	0.09	NA	2.82	0.126727	0.20059
Stereocilia	triobpa	14.94	2.28	up	2.38183	3.84e-08	2.95e-07
Signal transduction	cacna1d	55.02	8.67	up	2.33829	6.32e-07	3.84e-06
Stereocilia	espn	1.01	0.16	NA	2.32254	0.0885302	0.148812
Neurone	nipbla	63.41	10.05	up	2.33633	9.65e-22	5.7e-20
Signal transduction	chrna10a	2.64	0.43	up	2.25128	0.011709	0.026075
Stereocilia	atp8b1	6.63	1.16	NA	2.17569	0.280387	0.396339
Neurone	hpn	19.26	3.37	up	2.20452	1.02e-08	8.72e-08
Neurone	chd7	23.81	4.24	up	2.18776	0.00048653	0.00156196
Neurone	atp8a2	173.49	32.49	up	2.10099	1.44e-14	3.31e-13
Hair Cell	kcnq4	2.49	0.47	up	2.10894	2.49e-05	0.000108975
Semicircular canal	lrig3	9.21	1.86	up	1.99976	3.44e-05	0.000145673
Hair Cell	wdpcp	35.19	7.16	up	1.98585	3.99e-08	3.06e-07
Stereocilia	myo15ab	29.19	5.95	up	1.9726	0.00835856	0.0194048
Semicircular canal	bmper	13.45	2.93	up	1.87617	1.01e-07	7.18e-07
Stereocilia	mkks	8.35	2.08	up	1.69778	1.02e-05	4.85e-05
otolith	sparc	618.51	160.5	up	1.61683	0.00125422	0.00364655
Neurone	ror2	1.57	0.41	NA	1.64108	0.0887164	0.149054
Hair Cell	vangl2	23.81	6.34	up	1.59007	6.62e-09	5.81e-08
Supporting Cell	notch1b	10.26	2.83	up	1.53555	5.39e-06	2.71e-05
Stereocilia	ush1c	24.82	7.81	NA	1.37725	0.149561	0.229955
Neurone	nipblb	25.54	8.13	up	1.32213	2.14e-06	1.17e-05
Stereocilia	lhfpl5b	1.49	0.49	NA	1.32256	0.342606	0.451624
Signal transduction	slc26a5	93.9	31.81	up	1.22947	0.000137892	0.000508354
Hair Cell	wnt5a	4.46	1.53	NA	1.29916	0.17879	0.266225
Stereocilia	espn	1.01	0.16	NA	2.32254	0.0885302	0.148812
Signal transduction	slc17a8	1.75	0.62	NA	1.13817	0.421823	0.531895
Hair Cell	ptk7	12.11	4.36	up	1.15463	0.00132914	0.00383962
Hair Cell	strc	8.98	3.32	NA	1.09609	0.330294	0.43831
Signal transduction	dnm1l	65.78	24.52	up	1.10646	0.000970086	0.00289428
Supporting Cell	birc5a	15.76	5.91	NA	1.11907	0.0605488	0.107273
Signal transduction	cacna1db	8.4	3.35	up	1.00445	0.000688504	0.00213626
Hair Cell	dvl2	12.78	5.19	NA	0.978027	0.00696898	0.016516
Hair Cell	cdkn1bb	11.81	4.84	NA	0.955035	0.0346078	0.0665652
Stereocilia	tmc2	0.6	0.25	NA	0.874139	0.252978	0.354319
Hair Cell	slc4a7	57.91	24.63	NA	0.907322	0.00257344	0.00689656
Stereocilia	myo6a	81.67	41.34	NA	0.662824	0.0287304	0.056844
Hair Cell	cxcl14	277.33	150.16	NA	0.550471	0.453413	0.562699
Stereocilia	ush1ga	8.62	4.69	NA	0.578977	0.217977	0.313501
Signal transduction	gabrb2a	179.64	101.17	NA	0.520555	0.566471	0.66749
Neurone	hpca	30.28	17.33	NA	0.505115	0.185501	0.274368
Hair Cell	gata3	20.58	12.17	NA	0.499548	0.683778	0.765136
Semicircular canal	dlx5a	75.5	45.78	NA	0.384301	0.698721	0.777261
Hair Cell	tgfb1a	9.18	5.65	NA	0.364702	0.544385	0.647907
Neurone	fzd6	9.04	5.6	NA	0.377969	0.552565	0.654519
otolith	slc9a3r1b	40.21	24.96	NA	0.338062	0.6232	0.716838
Supporting Cell	notch1a	4.55	2.96	NA	0.291521	0.616477	0.710994
Stereocilia	myo3a	0.96	0.64	NA	0.320217	0.693737	0.773218
Stereocilia	diaph1	3.03	2.05	NA	0.221072	0.787236	0.846566
Hair Cell	sec24b	38	27.32	NA	0.156424	0.637012	0.728574
Stereocilia	myo6b	7.21	5.2	NA	0.135681	0.894321	0.926518
Signal transduction	dnm1a	171.89	132.14	NA	0.0590824	0.924429	0.94926
Neurone	fzd3	18.67	14.5	NA	0.0530767	0.941972	0.961753
Hair Cell	usp53	1.77	1.45	NA	-0.03838	0.953247	0.969436
Neurone	plppr4a	24.9	20.53	NA	-0.00963473	0.991839	0.994419
Neurone	hexb	55.67	46.96	NA	-0.0801136	0.772675	0.836259
Hair Cell	usp53b	4.76	4.18	NA	-0.0989349	0.903716	0.933166
Neurone	tfap2a	8.19	7.24	NA	-0.0933167	0.919178	0.945173
otolith	cldnj	7.99	5.48	NA	-0.206604	-0.243467	0.807644
Stereocilia	whrna	6.18	5.89	NA	-0.250727	0.613696	0.708829
Supporting Cell	birc5b	0.95	1.02	NA	-0.496749	0.656392	0.744553
Hair Cell	abhd12	64.8	76.25	NA	-0.558902	0.12975	0.204646
Stereocilia	pcdh15b	2.07	2.48	NA	-0.571254	0.25158	0.352734
Stereocilia	ripor2	6.55	8.11	NA	-0.610824	0.127366	0.201426
Neurone	ephb2b	6.85	8.76	NA	-0.655409	0.10336	0.169191
Stereocilia	grxcr1a	3.12	4.01	NA	-0.691903	0.507662	0.612941
Hair Cell	kitb	10.56	13.62	NA	-0.661263	0.319373	0.426865
Neurone	tub	50.55	69.19	NA	-0.772389	0.214755	0.309517
Signal transduction	otofa	3.62	5.1	NA	-0.773286	0.268846	0.3719
Stereocilia	bmp4	1.77	2.5	NA	-0.766701	0.441466	0.551455
Neurone	kcnc1b	32.62	47.1	NA	-0.876972	0.0646564	0.113544
Hair Cell	kita	2.33	3.4	NA	-0.827577	0.329873	0.437893
Hair Cell	dll1	1.19	1.91	NA	-1.05013	0.0442261	0.0821364
Hair Cell	pgap1	4.71	7.58	NA	-0.99336	0.00431144	0.0108557
Hair Cell	atp2b2	41.15	66.8	NA	-1.00191	0.115738	0.186076
Hair Cell	ndp	3.53	5.74	NA	-1.04565	0.0365327	0.0697173
Stereocilia	adgrv1	2.56	4.17	NA	-1.02353	0.224666	0.321419
Stereocilia	clic5b	0.41	0.67	NA	-0.947312	0.508676	0.613992
Hair Cell	prox1a	0.36	0.62	NA	-0.996512	0.430228	0.540411
Neurone	gabrb3	18.82	32.67	NA	-1.10618	0.0781939	0.133545
Neurone	cntn5	14	25.18	down	-1.16324	0.0134347	0.0293719
Signal transduction	gabrb2	13.8	25.16	down	-1.18173	0.00797343	0.0186454
Hair Cell	ntn1	0.85	1.62	NA	-1.24198	0.234307	0.332965
Stereocilia	mks1	16.65	36.56	down	-1.4597	0.000296445	0.00100964
Hair Cell	ntn1b	2.34	5.63	down	-1.55365	0.0212078	0.0436893
Stereocilia	cdh23	0.88	2.34	NA	-1.68942	0.0658805	0.115378
Neurone	plppr4b	0.55	2.22	down	-2.38034	7.74e-05	0.000302963
Signal transduction	gabra5	20.12	88.31	down	-2.44222	0.000471055	0.00151731
Supporting Cell	wdr1	37.31	197.36	down	-2.73868	1.26e-15	3.32e-14
Neurone	pou4f2	0.71	3.9	NA	-2.62407	0.161639	0.245446
Stereocilia	clrn1	3.32	19.79	down	-2.92125	6.68e-08	4.9e-07
otolith	slc9a3r1a	9.04	54.71	down	-2.91587	9.85e-13	1.68e-11
Stereocilia	dcdc2b	2.98	19.48	down	-2.9922	5.01e-12	7.59e-11
Neurone	slitrk6	0.64	5.04	down	-3.26183	1.88e-12	3.02e-11
Stereocilia	lhfpl5a	0.38	4.84	down	-3.67177	9.23e-05	0.000354303
Otolith membrane	otogl	0.13	2.46	down	-4.28808	0.000536715	0.0017037
Stereocilia	myo7ab	0.03	0.95	down	-5.72946	1.17e-05	5.48e-05
