# Supplementary material for: Chromosome-level genome assembly of hadal snailfish reveals mechanisms of deep-sea adaptation in vertebrates
Source: eLife. 2023 Dec 22;12:RP87198. doi: 10.7554/eLife.87198 (PMC10746142; doi:10.7554/eLife.87198)
Supplement: Supplementary file 15. [file elife-87198-supp15.xlsx]

## Sheet: Sheet1
	GO term	Type	Function	Adjusted p-value
Up-regulated	GO:0005929	Cellular Component	cilium	0.000216178
	GO:0006281	Biological Process	DNA repair	0.00103449
	GO:0005515	Molecular Function	protein binding	0.00207837
	GO:0005524	Molecular Function	ATP binding	0.00482011
	GO:0007018	Biological Process	microtubule-based movement	0.0290403
Down-regulated	GO:0016020	Cellular Component	membrane	8.79909e-13
	GO:0016021	Cellular Component	integral component of membrane	2.50363e-06
	GO:0005886	Cellular Component	plasma membrane	3.24766e-05
	GO:0005525	Molecular Function	GTP binding	0.00108943
	GO:0003924	Molecular Function	GTPase activity	0.00136529
	GO:1902600	Biological Process	proton transmembrane transport	0.00282949
	GO:0005739	Cellular Component	mitochondrion	0.00860869
	GO:0005743	Cellular Component	mitochondrial inner membrane	0.00988688
	GO:0008021	Cellular Component	synaptic vesicle	0.049246
	GO:0007399	Biological Process	nervous system development	0.049246
