# Supplementary material for: Chromosome-level genome assembly of hadal snailfish reveals mechanisms of deep-sea adaptation in vertebrates
Source: eLife. 2023 Dec 22;12:RP87198. doi: 10.7554/eLife.87198 (PMC10746142; doi:10.7554/eLife.87198)
Supplement: Supplementary file 16. [file elife-87198-supp16.xlsx]

## Sheet: Sheet1
Species	Gene	Bone	Brain	Cholecyst	Eye	Heart	Liver	Muscle	Skin	Spinal cord	Stomach
Hadal snailfish	fmo3a	0.109755	4.2056	641.013	0.0664005	20.1496	842.585	4.13508	17.9734	5.24269	0.953828
	fmo3b	7.31097	0.360669	57.6227	0.015649	1.89857	44.8301	0.817897	0.835329	0.419505	0.172386
	fmo3c	79.8848	1.15365	17.6455	1.47347	4.29918	18.5423	5.76778	3.38483	0.663175	7.18854
	fmo3d	41.6926	11.5829	44.6975	2.34948	16.3877	82.6725	12.934	9.85703	6.26913	62.1886
	fmo3e	9.25985	15.651	19.6187	7.70629	19.5998	16.9548	5.6271	8.16765	13.0275	4.73836
Tanaka's snailfish	fmo3a	0.200236	0.0501327	0.575352	0.030097	0.406901	899.114	0.0487173	0.294752	0.230145	0.0704837
	fmo3b1	0	0	0	0	0	0	0	0	0.01	0
	fmo3b2	0	0.0580167	0.139121	0	0	6.62035	0	0.0356615	0.000934	0.001302
	fmo3b3	0.01	0.04	3.46	0	0	0	0	0	0	0.1
	fmo3c	0.075996	0.0189097	0.0131275	0.059477	0.0403373	6.53116	0	0.0715695	0.0449205	0
	fmo3d	7.60118	4.49811	12.4313	4.87159	3.32309	97.8111	0.61725	3.77477	4.05839	8.36396
	fmo3e	5.03558	11.5019	1.14823	15.2706	6.41083	3.64982	1.15428	2.62092	8.92591	1.20181
